# Supplementary material
Source: ML conference proceedings conference paper supplement (https://openaccess.thecvf.com/content/CVPR2026/html/Luo_Restore_Text_First_CVPR_2026_paper.html)
Supplement: Supplementary file 1 [file Luo_Restore_Text_First_CVPR_2026_supplemental.pdf]

# Restore Text First, Enhance Image Later: Two-Stage Scene Text Image Super-Resolution with Glyph Structure Guidance

## Supplementary Material

### 7. Reproducibility Statement

To ensure reproducibility, we have made the following efforts:

1. We will release our code and dataset.
2. We provide implementation details in Sec. 5.1 and Sec. 11, including the training process and selection of hyper-parameters.
3. We provide details on evaluation metrics and dataset preparation in Sec. 4 and Sec. 10, and the code and data will be made available along with it.

### 8. Ethics Statement

This work focuses on improving scene text image super-resolution to support beneficial applications such as enhancing accessibility, document restoration, and navigation assistance. However, we acknowledge potential risks, including misuse in privacy-sensitive contexts (e.g., recovering text from personal or social media images) or unintended deployment in surveillance. To mitigate such risks, users are encouraged to combine our methods with privacy-preserving techniques such as watermarking or selective inpainting. Our UZ-ST dataset was collected from public, non-sensitive scenes under ethical guidelines, without including personally identifiable or private information. We believe the societal benefits of improved text image restoration outweigh potential risks, provided that the technology is applied responsibly.

### 9. LLM Acknowledgments

We thank ChatGPT (GPT-5) and DeepSeek for the help in refining the language and improving clarity. All wording and factual content were reviewed and approved by the authors.

### 10. Dataset Collection

We use VIVO X200 Ultra to collect images for 4 separate focal lengths (14 mm, 35 mm, 84 mm, and 200 mm). We first use PP-OCRV5 [7] for the rough annotation, then we manually filter the images and annotations. During the filtering and annotation, each image undergoes the following rules:

- Width or height of the image should be no less than 256.
- Height of the text should not be less than 32 pixels.
- Score of OCR recognition of the text should not be lower than 0.9.

- Content of the text should not be empty or consist solely of whitespace.

### 11. More Implementation Details

**Dataset Settings.** For training, we combine a synthetic dataset with real paired datasets (Real-CE [31] and UZ-ST). Our synthetic dataset builds upon LSDIR [26], containing 27,000 triplets  $(x_H, x_L, x_m)$ . We render text on the GT of LSDIR and the corresponding text mask using the LBTS [38], then apply Real-ESRGAN degradation Wang et al. [44] to generate LR images. Since there are misaligned image pairs in Real-CE [19, 58] and text lines not annotated, we filter out misaligned image pairs and reannotate the images manually. In the end, we obtain 337 training pairs and 188 testing pairs from the Real-CE dataset. Images under 13mm and 52mm focal lengths are considered as LR  $x_L$  and GT  $x_H$ , respectively. Following Hu et al. [19], we use SAM-TS [49] to obtain the text mask  $x_m$  from  $x_H$ . UZ-ST triplets  $(x_H, x_L, x_m)$  are processed identically. For stage 1 training, we use cropped text regions from the dataset, while for stage 2, we use full images. Following [39], we use PP-OCRV3 [23] to extract strings from the text region of predicted SR for evaluation of OCR-A.

**Training Details.** For stage 1, we build our model based on the IDM baseline of DiffTSR [58]. We set  $\lambda_{td}$ ,  $\lambda_{Seg}$ ,  $\lambda_{Focal}$ , and  $\lambda_{Dice}$  as 1, 0.1, 20, and 1 respectively. In stage 2, our model is built upon Stable Diffusion 3.5 medium [16] and follows a similar tile-based inference strategy to TADiSR [19] and SUPiR [50]. The timestep  $t$  is set to 150. The conditioning scale of the ControlNet is set to 1.0.  $\lambda_{I2}$ ,  $\lambda_{LPIPS}$ , and  $\lambda_{edge}$  are set to 1, 5, 100 when using the synthetic dataset for pretraining. Then,  $\lambda_{edge}$  is set to 0 and the remaining coefficients are kept unchanged when training on real paired datasets. We train both stages of the model using the AdamW [28] optimizer and set the learning rate to  $5 \times 10^{-5}$  and  $5 \times 10^{-6}$  for stages 1 and 2 separately. All experiments are conducted on NVIDIA H20 GPUs. For stage 1, we train the model on synthetic and real datasets for 8 epochs, then finetune it on synthetic data for 2 epochs. For stage 2, we first pretrain the model on the synthetic dataset for 50 epochs. Then we train on the real paired datasets for 50 epochs.

### 12. More details of UZ-ST

In Tab. 7, we provide detailed statistics on the composition of the UZ-ST dataset. Additionally, in Fig. 10, we present

Table 7. Statistics of dataset size and line count in subsets of UltraZoom-ST.

| Subset | image count | line count | mean lines/img | img > 5 lines |
|--------|-------------|------------|----------------|---------------|
| 14 mm  | 1,439       | 15,073     | 10.47          | 754           |
| 35 mm  | 1,798       | 17,263     | 9.60           | 867           |
| 85 mm  | 1,799       | 17,339     | 9.64           | 869           |

Table 8. Alignment comparison.

| Alignment Method                               | PSNR $\uparrow$ | MSE $\downarrow$ | SSIM $\uparrow$ | NCC $\uparrow$ | AKD $\downarrow$ |
|------------------------------------------------|-----------------|------------------|-----------------|----------------|------------------|
| RealSR                                         | 13.87           | 4002.65          | 0.5072          | 0.3285         | 546.78           |
| SIFT Alignment (Single time)                   | 12.77           | 6332.79          | 0.4896          | 0.4313         | 546.78           |
| <b>Cascade Coarse-to-Fine Alignment (Ours)</b> | <b>23.00</b>    | <b>441.52</b>    | <b>0.7279</b>   | <b>0.9184</b>  | <b>241.44</b>    |

some example images from the dataset.

### 13. Alignment Comparison

We compare our proposed Cascade Coarse-to-Fine alignment strategy with the alignment method proposed by RealSR [2] and single-time alignment using SIFT. During the comparison, we implement our strategy using SIFT and utilize the raw images from the 35mm dataset of our proposed UZ-ST dataset for evaluation. For metrics, we adopt PSNR, Mean Squared Error (MSE), SSIM [42], Normalized Cross-Correlation (NCC), and Average Keypoint Distance (AKD) to assess the alignment quality of the aligned image.

As shown in Tab. 8 and Fig. 6, pixel-based optimization methods break when handling heavily degraded images due to significant loss of details. Keypoint-based alignment like SIFT suffers from the lack of valid keypoint for matching. While our alignment method outperforms all other methods and achieves the best results, this is due to the progressive cascade alignment strategy, which breaks the hard alignment process into simpler tasks, facilitating the bridging between images taken under different focal lengths.

### 14. Additional results

We provide detailed quantitative results of UZ-ST in Tab. 11. Additional qualitative results are provided in Fig. 7 and Fig. 8. Fig. 9 also shows the ability of our method in handling other languages like Japanese and Korean.

We also conduct additional ablation experiment on how the randomness of OCR output affect our method. As shown in Tab. 10, the text accuracy gains as the randomness of the OCR output declines. However, even under complete random OCR prediction, our method still manage to outperform TADiSR thanks to the LR condition still guiding the stage 1 to generate text structures. This proves that the reliance of our method on the OCR model is limited.

### 15. Efficiency Analysis

As shown in Tab. 9, stage 1 is a standard diffusion process that takes multiple steps in inference, the efficiency of our model may be suboptimal compared to one-step methods. However, our method achieves state-of-the-art performance in OCR-A, which cannot be easily obtained by extending inference time.

Table 9. Efficiency analysis.

| Methods               | Flops (GFLOPs) | Speed (ms) | OCR-A |
|-----------------------|----------------|------------|-------|
| HAT                   | 6670.32        | 1086.68    | 37.9% |
| DiffTSR               | 58502.14       | 8610.59    | 31.7% |
| DiT4SR w/o llava      | 160787.14      | 17385.14   | 23.7% |
| DreamClear w/o llava  | 412843.67      | 83193.81   | 21.4% |
| TADiSR                | 4497.96        | 342.32     | 36.6% |
| TiGeSR (ours) Stage 1 | 6215.85        | 663.5      | 43.0% |
| TiGeSR (ours) Stage 2 | 3734.01        | 360.06     |       |

Table 10. Ablation on the effect of stochastic OCR outputs on the performance of our method. The performance gains as the randomness of the OCR output drops. Even under 100% random OCR output, our method still outperforms TADiSR, proving low reliance on OCR.

| Methods                                                             | PSNR↑        | SSIM↑        | LPIPS↓       | DISTS↓       | FID↓         | OCR-A↑       |
|---------------------------------------------------------------------|--------------|--------------|--------------|--------------|--------------|--------------|
| TADiSR                                                              | 24.68        | 0.795        | 0.362        | 0.227        | 52.13        | 35.5%        |
| TiGeSR (Ours) performance under different randomness of OCR output. |              |              |              |              |              |              |
| 100% Random Text                                                    | 25.60        | 0.833        | 0.188        | <b>0.150</b> | 28.92        | 40.3%        |
| 50% Random Text                                                     | 25.60        | 0.833        | 0.189        | 0.151        | 28.92        | 40.6%        |
| 20% Random Text                                                     | <b>25.63</b> | <b>0.834</b> | <b>0.185</b> | <b>0.150</b> | 29.3         | 43.7%        |
| <b>0% Random Text (Ours)</b>                                        | <b>25.63</b> | <b>0.834</b> | <b>0.185</b> | <b>0.150</b> | <b>28.82</b> | <b>44.6%</b> |

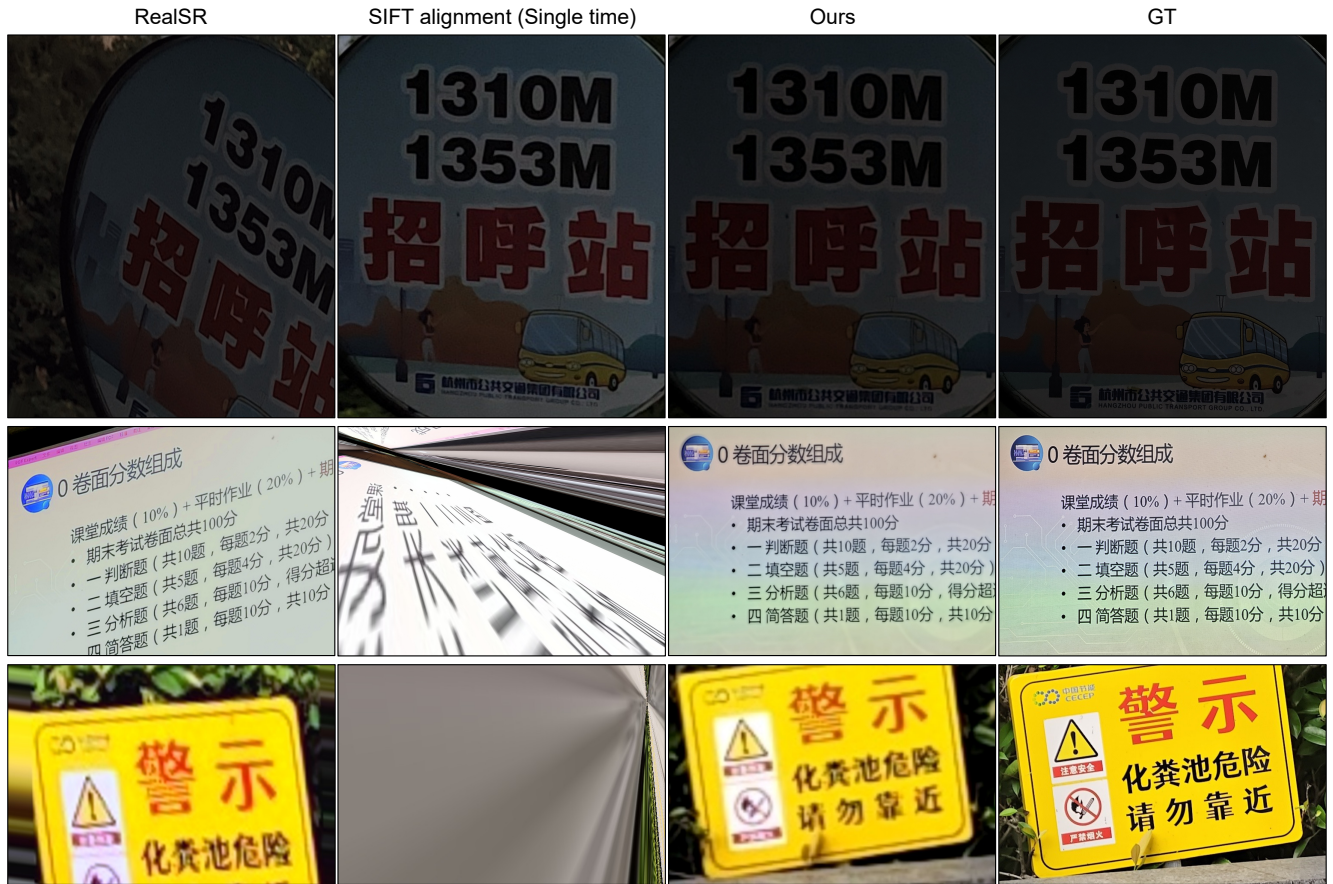

Figure 6. Alignment method comparison.

Table 11. Evaluation Results on Both Image Quality and Text Accuracy on UltraZoom-ST.

|                         | Methods     | PSNR $\uparrow$ | SSIM $\uparrow$ | LPIPS $\downarrow$ | DISTS $\downarrow$ | FID $\downarrow$ | PSNR $_{cr}$ $\uparrow$ | SSIM $_{cr}$ $\uparrow$ | LPIPS $_{cr}$ $\downarrow$ | DISTS $_{cr}$ $\downarrow$ | OCR-A $\uparrow$ |
|-------------------------|-------------|-----------------|-----------------|--------------------|--------------------|------------------|-------------------------|-------------------------|----------------------------|----------------------------|------------------|
| 85mm ( $\times 2.35$ )  | Real-ESRGAN | 25.84           | 0.854           | 0.139              | <u>0.130</u>       | 28.25            | 23.59                   | 0.843                   | 0.170                      | 0.168                      | 60.8%            |
|                         | HAT         | <b>27.33</b>    | <b>0.873</b>    | <u>0.128</u>       | <u>0.133</u>       | 27.21            | <u>24.76</u>            | <b>0.870</b>            | <u>0.139</u>               | <u>0.146</u>               | 62.0%            |
|                         | MACRONet    | 22.90           | 0.804           | <u>0.234</u>       | 0.173              | 40.19            | 17.92                   | 0.693                   | <u>0.515</u>               | <u>0.360</u>               | 54.2%            |
|                         | SeeSR       | 25.02           | 0.826           | 0.167              | 0.159              | 32.31            | 21.62                   | 0.796                   | 0.245                      | 0.207                      | 28.2%            |
|                         | SupIR       | 25.58           | 0.823           | 0.202              | 0.160              | 29.33            | 21.91                   | 0.808                   | 0.239                      | 0.214                      | 33.3%            |
|                         | DiffTISR    | 23.48           | 0.805           | 0.230              | 0.157              | 35.77            | 17.92                   | 0.688                   | 0.392                      | 0.285                      | 48.2%            |
|                         | DiffBIR     | 25.25           | 0.793           | 0.175              | 0.152              | 24.57            | 22.26                   | 0.803                   | 0.218                      | 0.190                      | 36.8%            |
|                         | OSEDiff     | 26.38           | 0.852           | 0.153              | 0.137              | 23.92            | 22.84                   | 0.833                   | 0.200                      | 0.204                      | 41.0%            |
|                         | DreamClear  | 25.31           | 0.811           | 0.169              | 0.151              | <u>24.19</u>     | 21.44                   | 0.790                   | 0.253                      | 0.221                      | 26.8%            |
|                         | TSD-SR      | 23.99           | 0.800           | 0.161              | 0.165              | 30.40            | 20.62                   | 0.786                   | 0.232                      | 0.218                      | 37.8%            |
|                         | DiT4SR      | 24.71           | 0.810           | 0.173              | 0.143              | 29.15            | 21.25                   | 0.800                   | 0.221                      | 0.193                      | 48.2%            |
|                         | TADiSR      | 26.31           | 0.858           | 0.177              | 0.149              | 30.47            | 23.55                   | 0.856                   | 0.175                      | 0.178                      | 55.7%            |
|                         | Ours        | <u>27.00</u>    | <u>0.871</u>    | <b>0.123</b>       | <b>0.120</b>       | <b>22.34</b>     | <b>24.31</b>            | <u>0.860</u>            | <b>0.135</b>               | <b>0.142</b>               | <b>63.2%</b>     |
| 35mm ( $\times 5.71$ )  | Real-ESRGAN | 23.70           | 0.785           | 0.218              | 0.184              | 42.62            | 20.86                   | 0.782                   | 0.272                      | 0.235                      | 34.1%            |
|                         | HAT         | 25.05           | 0.819           | 0.207              | 0.182              | 41.32            | <u>21.98</u>            | <u>0.816</u>            | <u>0.250</u>               | 0.241                      | 34.6%            |
|                         | MACRONet    | 22.28           | 0.774           | 0.284              | 0.199              | 49.14            | 17.43                   | 0.694                   | 0.523                      | 0.361                      | 31.5%            |
|                         | SeeSR       | 23.76           | 0.795           | 0.198              | 0.175              | 37.92            | 20.55                   | 0.778                   | 0.271                      | 0.222                      | 25.2%            |
|                         | SupIR       | 23.49           | 0.746           | 0.302              | 0.204              | 41.80            | 20.00                   | 0.757                   | 0.335                      | 0.282                      | 24.0%            |
|                         | DiffTISR    | 22.57           | 0.773           | 0.281              | 0.184              | 45.78            | 16.99                   | 0.671                   | 0.443                      | 0.312                      | 31.2%            |
|                         | DiffBIR     | 23.76           | 0.731           | 0.245              | 0.196              | 35.99            | 20.82                   | 0.770                   | 0.275                      | 0.234                      | 28.6%            |
|                         | OSEDiff     | <u>25.35</u>    | <u>0.827</u>    | <u>0.192</u>       | 0.166              | <u>29.06</u>     | 21.62                   | 0.809                   | 0.263                      | 0.263                      | 29.9%            |
|                         | DreamClear  | <u>24.20</u>    | <u>0.778</u>    | <u>0.209</u>       | 0.177              | <u>32.08</u>     | 20.66                   | 0.779                   | 0.283                      | 0.251                      | 23.9%            |
|                         | TSD-SR      | 22.93           | 0.757           | 0.200              | 0.199              | 37.61            | 19.64                   | 0.760                   | 0.282                      | 0.246                      | 27.3%            |
|                         | DiT4SR      | 23.45           | 0.774           | 0.204              | <u>0.158</u>       | 31.73            | 20.12                   | 0.779                   | <u>0.250</u>               | <u>0.208</u>               | 26.5%            |
|                         | TADiSR      | 24.68           | 0.795           | 0.362              | 0.227              | 52.13            | 21.57                   | 0.798                   | 0.366                      | 0.347                      | <u>35.5%</u>     |
|                         | Ours        | <b>25.63</b>    | <b>0.834</b>    | <b>0.185</b>       | <b>0.150</b>       | <b>28.82</b>     | <b>22.14</b>            | <b>0.823</b>            | <b>0.204</b>               | <b>0.194</b>               | <b>44.6%</b>     |
| 14mm ( $\times 14.29$ ) | Real-ESRGAN | 22.09           | 0.718           | 0.423              | 0.284              | 89.22            | 18.87                   | 0.721                   | 0.503                      | 0.427                      | 11.5%            |
|                         | HAT         | 22.66           | 0.738           | 0.451              | 0.299              | 89.58            | <u>19.27</u>            | <u>0.738</u>            | 0.533                      | 0.484                      | 12.2%            |
|                         | MACRONet    | 21.00           | 0.716           | 0.422              | 0.254              | 79.67            | 17.01                   | 0.680                   | 0.553                      | 0.382                      | 10.1%            |
|                         | SeeSR       | 21.79           | 0.731           | 0.310              | 0.228              | 64.31            | 18.87                   | 0.717                   | 0.396                      | 0.308                      | 13.2%            |
|                         | SupIR       | 21.38           | 0.681           | 0.447              | 0.268              | 70.09            | 17.99                   | 0.690                   | 0.487                      | 0.383                      | 11.0%            |
|                         | DiffTISR    | 20.88           | 0.713           | 0.412              | 0.233              | 74.07            | 15.87                   | 0.630                   | 0.538                      | 0.348                      | 12.0%            |
|                         | DiffBIR     | 21.61           | 0.630           | 0.392              | 0.255              | 69.64            | 18.61                   | 0.685                   | 0.438                      | 0.328                      | 11.3%            |
|                         | OSEDiff     | <u>23.11</u>    | <u>0.768</u>    | <u>0.274</u>       | 0.214              | 49.76            | 19.44                   | 0.740                   | 0.385                      | 0.334                      | 12.7%            |
|                         | DreamClear  | 22.45           | 0.719           | <u>0.364</u>       | 0.260              | 62.95            | 19.14                   | 0.725                   | 0.440                      | 0.377                      | 11.7%            |
|                         | TSD-SR      | 21.14           | 0.705           | <b>0.273</b>       | 0.225              | 57.07            | 17.67                   | 0.686                   | 0.393                      | <u>0.293</u>               | 11.9%            |
|                         | DiT4SR      | 20.88           | 0.707           | 0.282              | <b>0.181</b>       | <b>47.45</b>     | 17.36                   | 0.687                   | <b>0.367</b>               | <b>0.253</b>               | 11.7%            |
|                         | TADiSR      | 22.43           | 0.721           | 0.555              | 0.320              | 98.44            | 19.20                   | 0.730                   | 0.585                      | 0.518                      | 14.4%            |
|                         | Ours        | <b>23.41</b>    | <b>0.774</b>    | 0.301              | <u>0.209</u>       | <u>54.74</u>     | <b>19.73</b>            | <b>0.748</b>            | <u>0.374</u>               | 0.322                      | <u>16.0%</u>     |
| Total                   | RealEsrGAN  | 23.99           | 0.790           | 0.248              | 0.194              | 30.60            | 21.25                   | 0.786                   | 0.302                      | 0.266                      | 37.1%            |
|                         | HAT         | <u>25.17</u>    | 0.815           | 0.249              | 0.198              | 30.12            | <u>22.18</u>            | <u>0.813</u>            | 0.291                      | 0.276                      | 37.9%            |
|                         | MARCONet    | 22.13           | 0.768           | 0.306              | 0.205              | 34.28            | 17.48                   | 0.690                   | 0.529                      | 0.366                      | 33.4%            |
|                         | SeeSR       | 23.64           | 0.788           | 0.219              | 0.184              | 26.73            | 20.45                   | 0.767                   | 0.297                      | 0.241                      | 22.8%            |
|                         | SupIR       | 23.62           | 0.754           | 0.308              | 0.207              | 27.91            | 20.10                   | 0.756                   | 0.344                      | 0.287                      | 23.6%            |
|                         | DiffTISR    | 22.41           | 0.767           | 0.300              | 0.189              | 31.25            | 17.00                   | 0.665                   | 0.452                      | 0.313                      | 31.7%            |
|                         | DiffBIR     | 23.67           | 0.724           | 0.262              | 0.197              | 23.10            | 20.70                   | 0.757                   | 0.302                      | 0.245                      | 26.6%            |
|                         | OSEDiff     | 25.07           | <u>0.819</u>    | <u>0.201</u>       | 0.169              | <u>20.53</u>     | 21.43                   | 0.798                   | 0.276                      | 0.263                      | 28.9%            |
|                         | DreamClear  | 24.10           | 0.773           | <u>0.238</u>       | 0.191              | 21.75            | 20.50                   | 0.768                   | 0.317                      | 0.276                      | 21.4%            |
|                         | TSD-SR      | 22.79           | 0.757           | 0.207              | 0.194              | 24.08            | 19.42                   | 0.748                   | 0.296                      | 0.249                      | 26.6%            |
|                         | DiT4SR      | 23.16           | 0.767           | 0.215              | <u>0.159</u>       | 20.58            | 19.73                   | 0.760                   | <u>0.273</u>               | <u>0.216</u>               | 23.7%            |
|                         | TADiSR      | 24.61           | 0.796           | 0.203              | 0.160              | 36.61            | 21.59                   | 0.799                   | 0.360                      | 0.336                      | 36.6%            |
|                         | Ours        | <b>25.48</b>    | <b>0.830</b>    | <b>0.196</b>       | <b>0.156</b>       | <b>20.01</b>     | <b>22.22</b>            | <b>0.814</b>            | <b>0.228</b>               | <b>0.212</b>               | <b>43.0%</b>     |

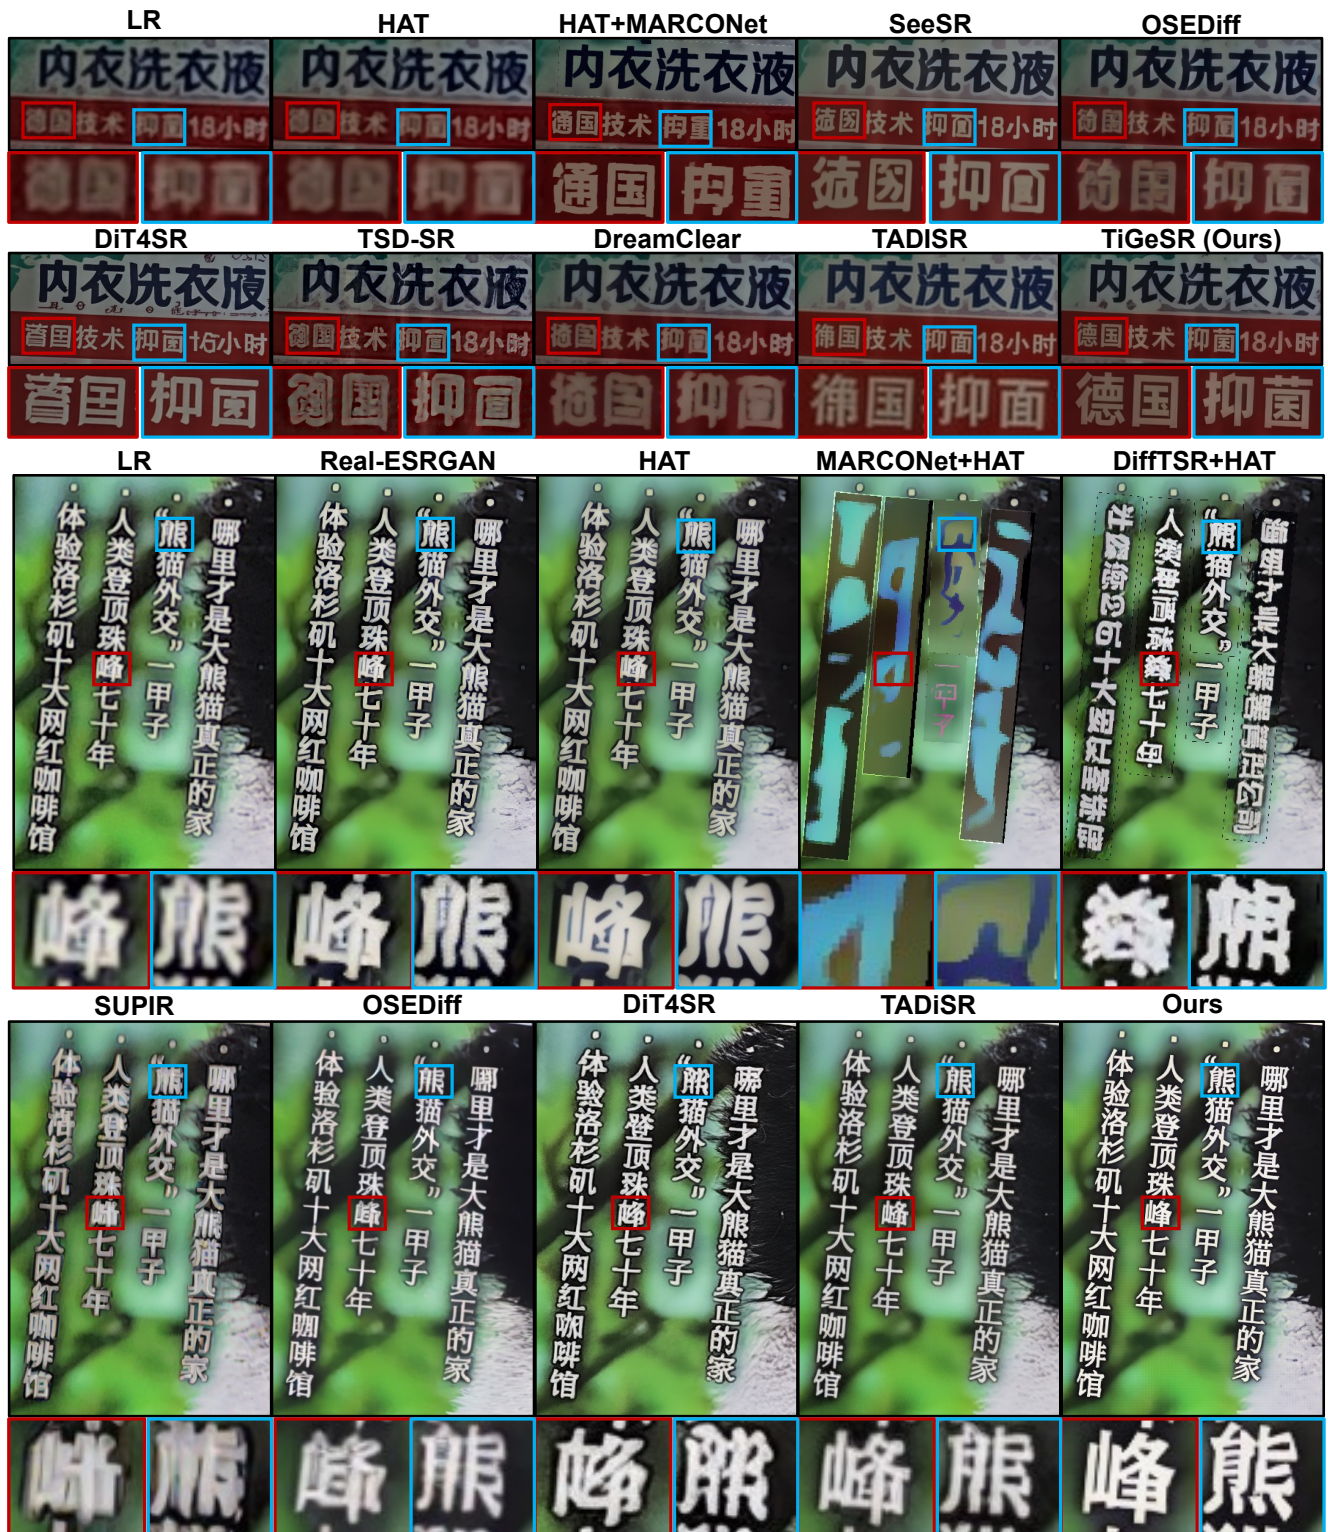

Figure 7. Additional qualitative results of TiGeSR.

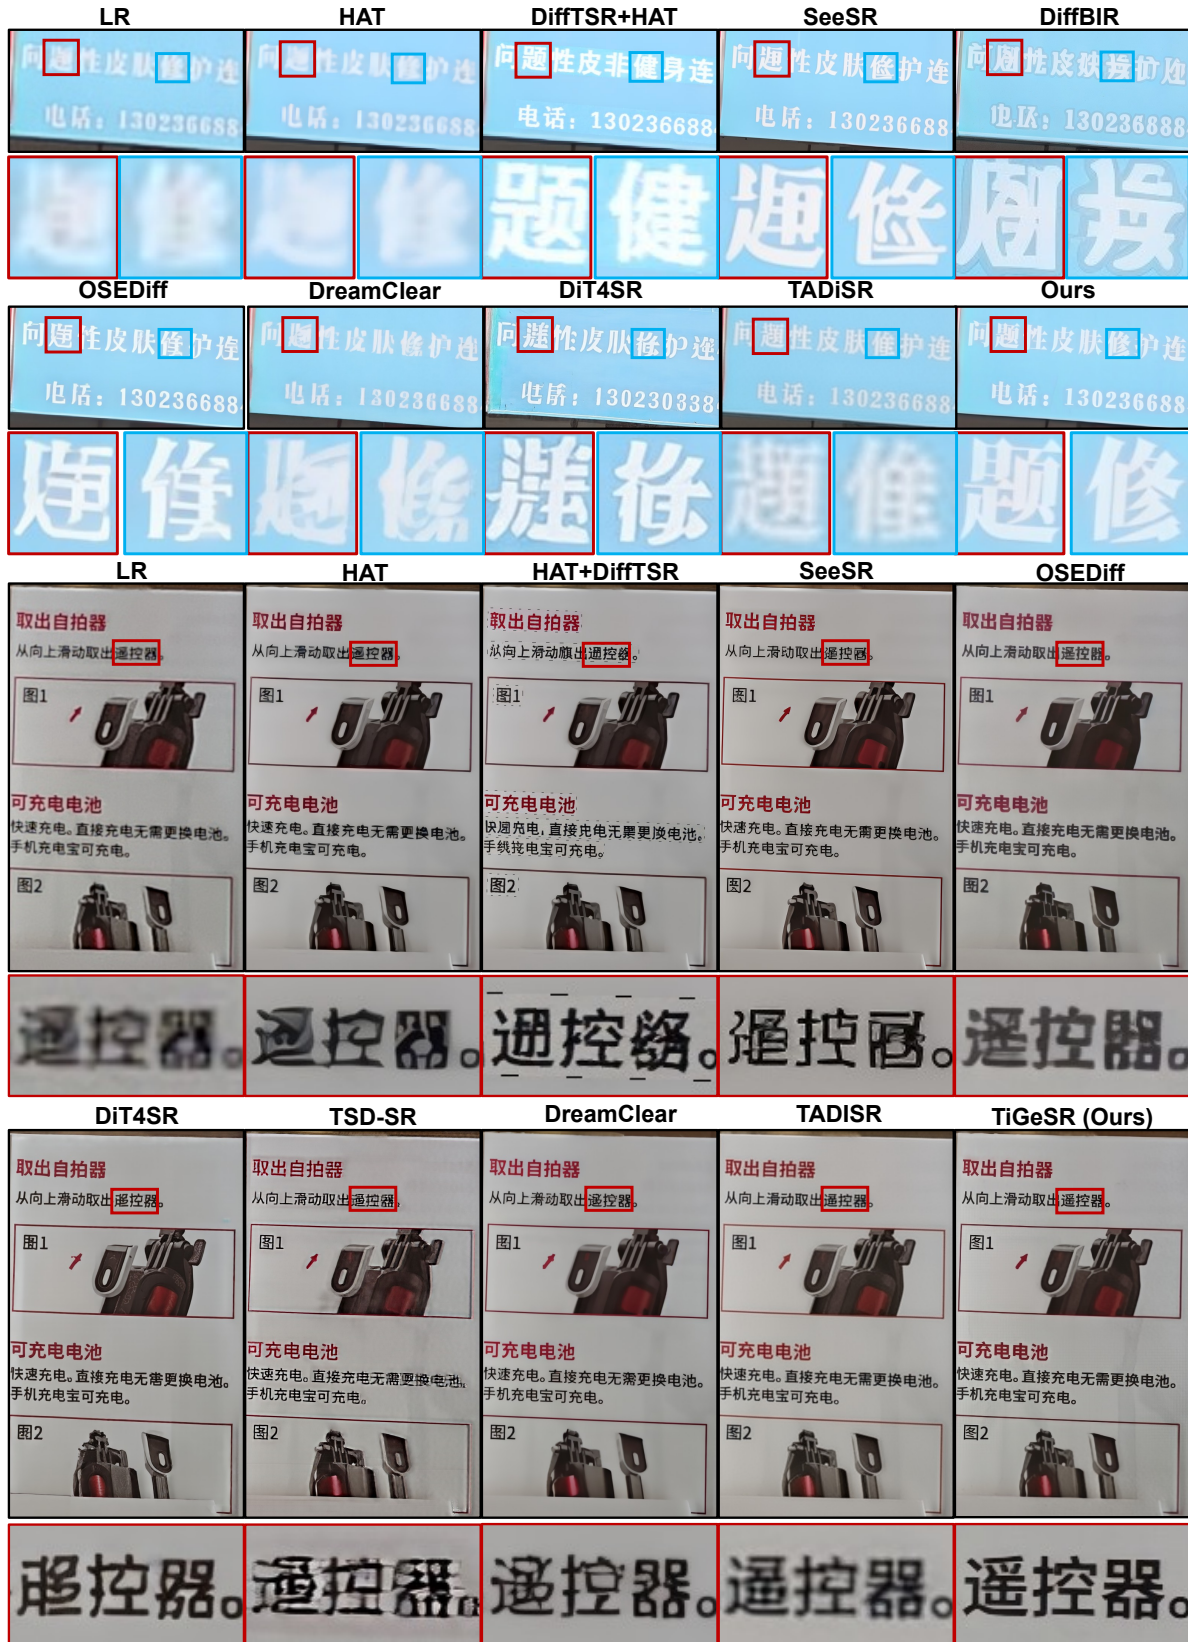

Figure 8. Additional qualitative results of TiGeSR.

LR

TiGeSR (Ours)

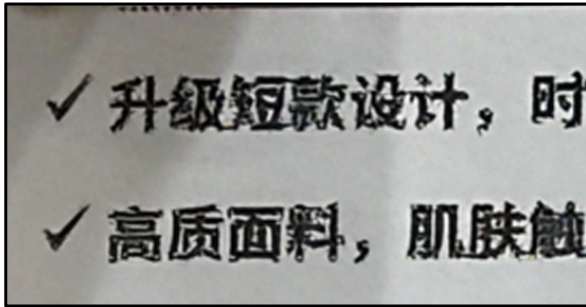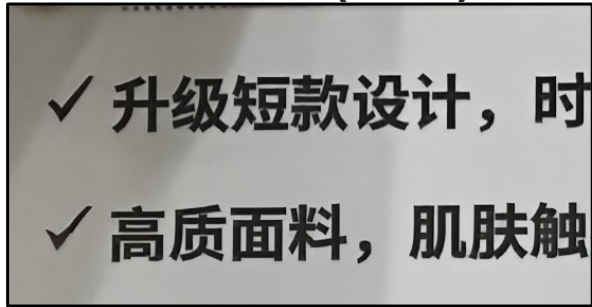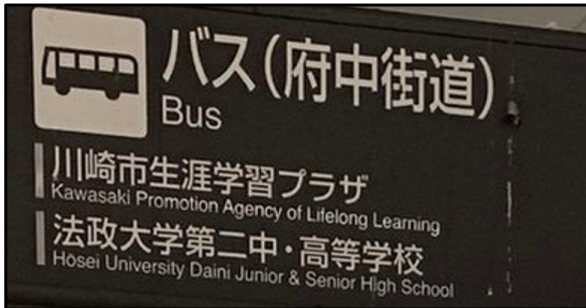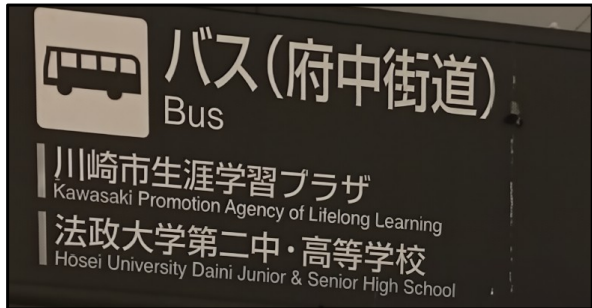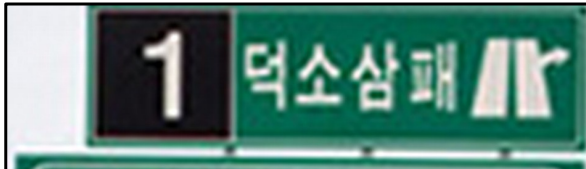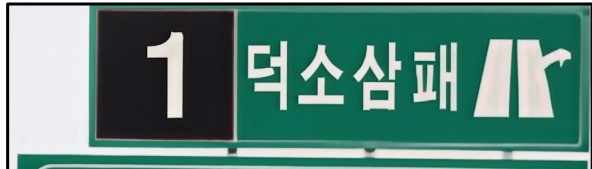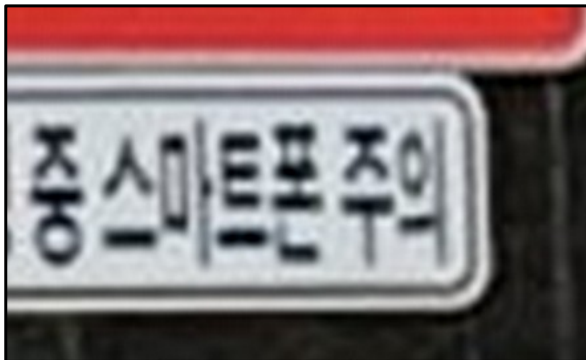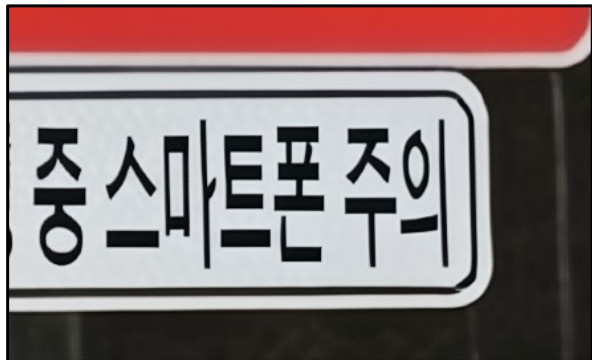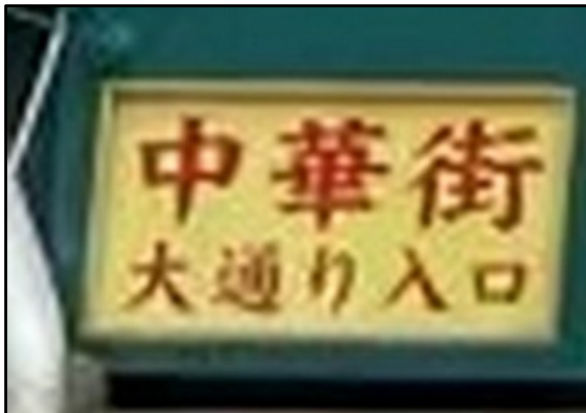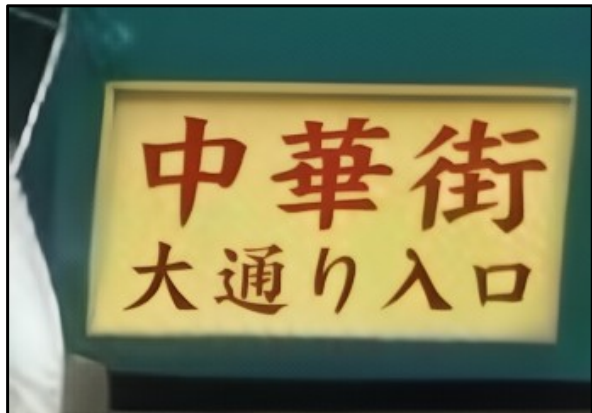

Figure 9. Demonstration of our method under different languages. (Zoom in for more details.)

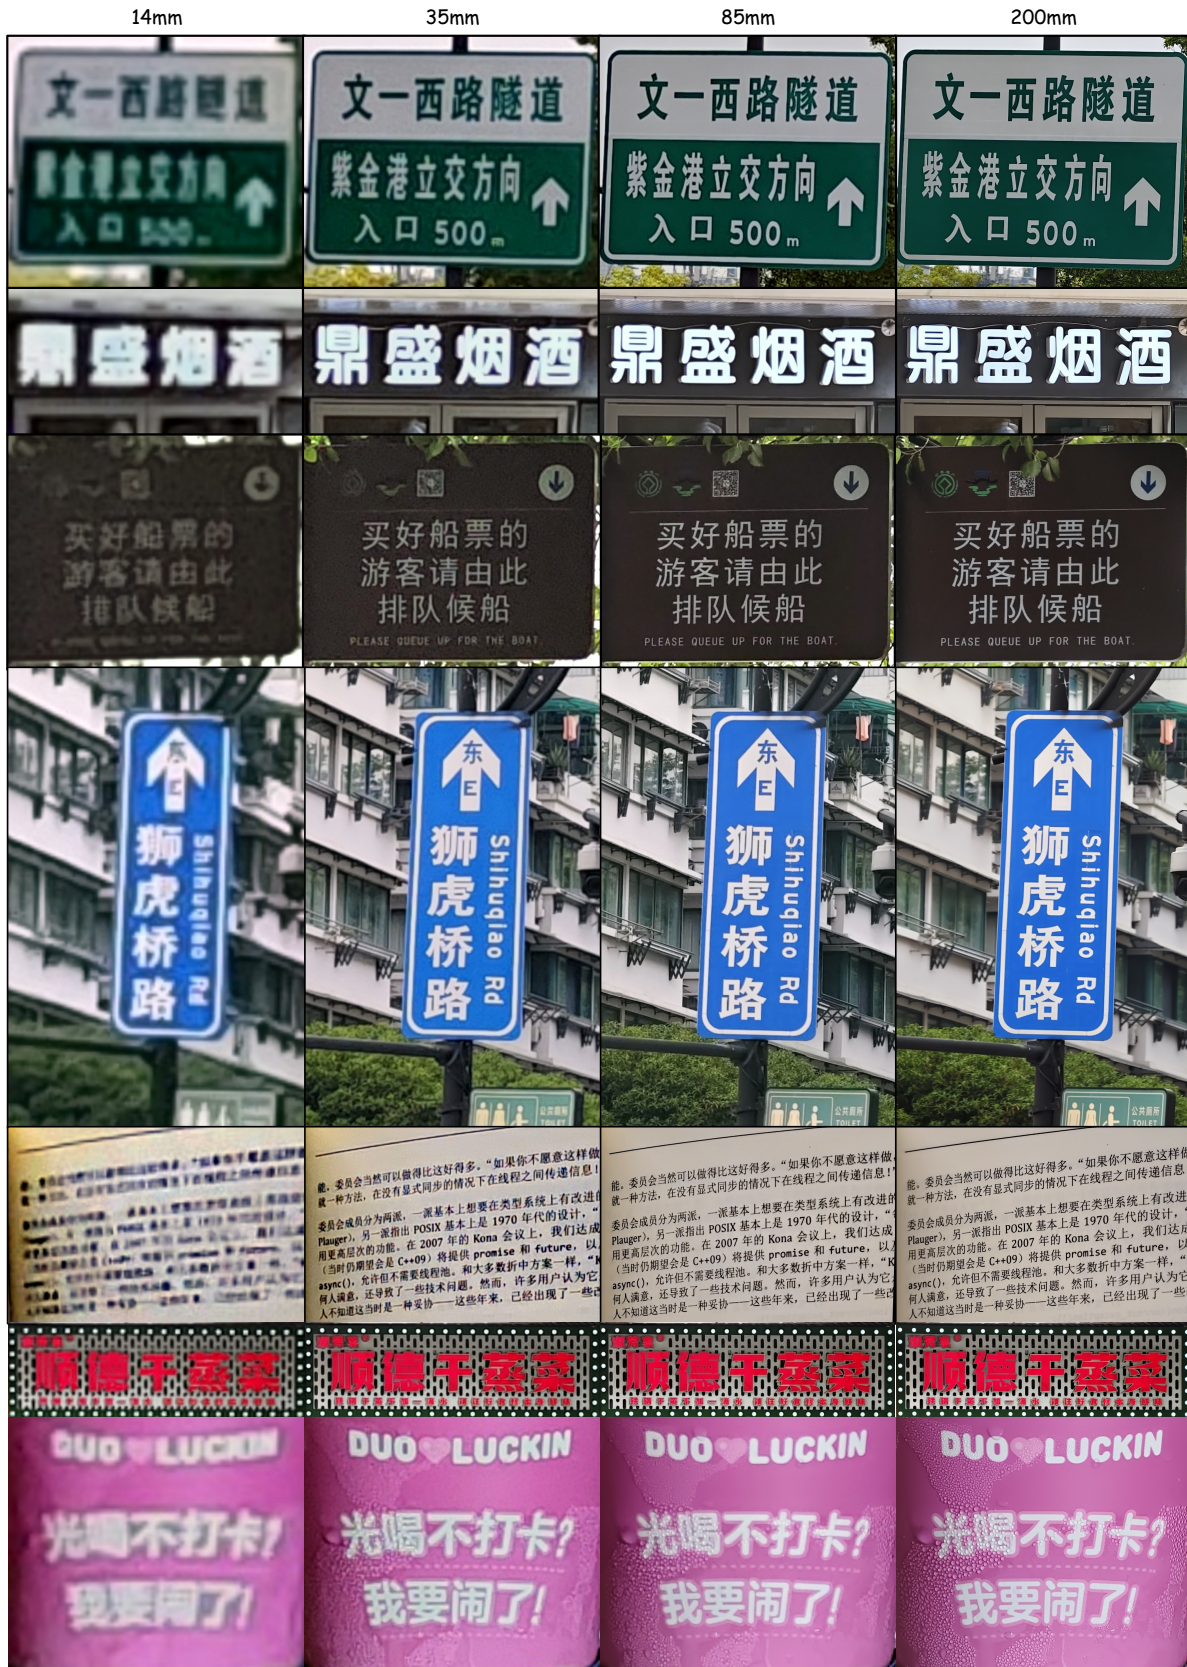

Figure 10. Detailed examples of UZ-ST.
